# Supplementary material
Source: publisher figshare collection journal article supplement (https://frontiersin.figshare.com/ndownloader/files/14915381)
Supplement: Supplementary file [file 14915381]

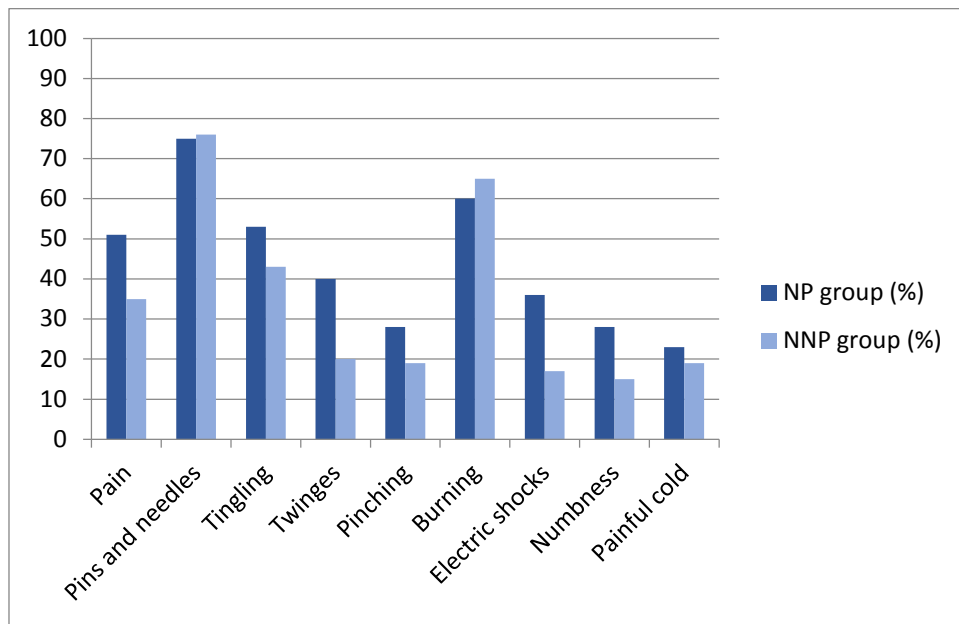

Figure 1. Frequency of sensory descriptors in NP and NNP
